# Supplementary material
Source: PubMed Central journal article supplement (PMC7593428)
Supplement: EMP2-1-1030-s001.pdf [file EMP2-1-1030-s001.pdf]

## Week 10 (May 11 to May 17) / Semaine 10 (11 mai au 17 mai)

The following questions relate to activities during the week of May 11 to May 17.

Les questions suivantes concernent les activités de la semaine du 11 mai au 17 mai.

record id \_\_\_\_\_

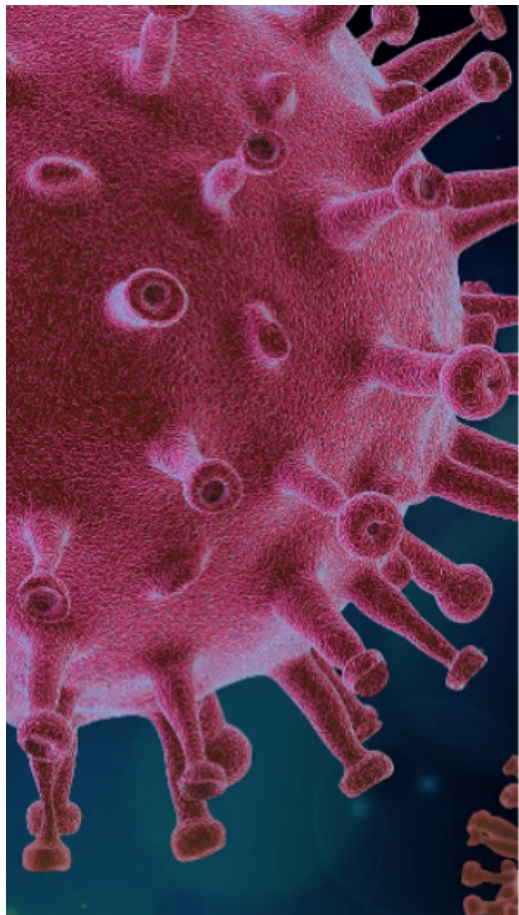

# Canadian Emerg Doc Pandemic Wellness Study

Follow us  @EmergWell

During the week of May 11 to May 17, were you tested for COVID-19?

Au cours de la semaine 11 mai au 17 mai, avez-vous été testé(e) pour la COVID-19?

- Yes / Oui  
 No / Non

What was the result?

Quel était le résultat?

- Negative for COVID-19 / Négatif pour la COVID-19  
 Positive for COVID-19 / Positif pour la COVID-19  
 Results still pending / Les résultats sont toujours en attente

---

During the week of May 11 to May 17 how many shifts did you work?

Pendant la semaine du 11 mai au 17 mai, combien de quarts avez-vous travaillé?

---

---

During the week of May 11 to May 17, how many of your scheduled shifts were you unable to work?

Au cours de la semaine du 11 mai au 17 mai, combien de quarts de travail prévus n'avez-vous pas pu travailler?

---

Why weren't you able to work all of your scheduled shifts?

Pourquoi n'avez-vous pas été en mesure de travailler tous vos quarts de travail prévus?

- Quarantined / En quarantaine
  - COVID +ve but well / COVID + mais bien
  - COVID +ve and ill at home / COVID + et malade à la maison
  - COVID +ve and admitted to hospital / COVID + et admis à l'hôpital
  - Childcare issues/family problem / Problèmes de garde d'enfants/problème familial
  - Other / Autre raison
- 

During the week of May 11 to May 17, how many extra unscheduled shifts did you have to pick up at short notice?

Au cours de la semaine du 11 mai au 17 mai, combien de quarts de travail supplémentaires non planifiés avez-vous dû prendre à court préavis ?

---

Were you unable to work this week and not scheduled for any shifts?

Avez-vous été incapable de travailler cette semaine alors que vous n'aviez pas de quarts de travail prévus?

- Yes / Oui
  - No / Non
- 

Why were you unable to work?

Pourquoi n'étiez-vous pas en mesure de travailler ?

- Quarantined / En quarantaine
  - COVID +ve but well / COVID + mais bien
  - COVID +ve and ill at home / COVID + et malade à la maison
  - COVID +ve and admitted to hospital / COVID + et admis à l'hôpital
  - Childcare issues/family problem / Problèmes de garde d'enfants/problème familial
  - Other / Autre raison
- 

During the week of May 11 to May 17, on how many patients did you perform an aerosol generating medical procedure (for example, intubation, non-invasive ventilation or giving nebulized medication)?

Au cours de la semaine du 11 mai au 17 mai, sur combien de patients avez-vous effectué une intervention médicale générant des aérosols (IMGA) (par exemple, intubation, ventilation non invasive ou administration de médicaments en nébulisation)?

---

---

During the week of May 11 to May 17, did you work all of your shifts in your usual department and hospital?

Au cours de la semaine du 11 mai au 17 mai, avez-vous travaillé tous vos quarts de travail dans votre service et votre hôpital habituels?

- Yes / Oui  
 No / Non

---

Where else did you work?

Où avez-vous travaillé ailleurs?

- I worked in a different department that was new to me (not emergency) / J'ai travaillé dans un département différent qui était nouveau pour moi (pas à l'urgence)  
 I worked in a different hospital that was new to me / J'ai travaillé dans un hôpital différent qui était nouveau pour moi

---

I feel burned out from my work.

Je me sens épuisé par mon travail.

- Never / Jamais  
 A few times a year or less / Quelques fois par an ou moins  
 Once a month or less / Une fois par mois ou moins  
 A few times a month / Quelques fois par mois  
 Once a week / Une fois par semaine  
 A few times a week / Quelques fois par semaine  
 Every day / Chaque jour

---

I have become more callous toward people since I took this job.

Je suis devenu(e) plus insensible envers les gens depuis que j'ai accepté ce poste.

- Never / Jamais  
 A few times a year or less / Quelques fois par an ou moins  
 Once a month or less / Une fois par mois ou moins  
 A few times a month / Quelques fois par mois  
 Once a week / Une fois par semaine  
 A few times a week / Quelques fois par semaine  
 Every day / Chaque jour

---

Please use this space to share any additional thoughts and experiences.

Utilisez cet espace pour nous faire part de vos perspectives et expériences.

---

Please see the attached for free physician wellness resources.

Veuillez consulter le document ci-joint pour des ressources gratuites sur le bien-être des médecins.

[Attachment: "Physician Wellness Resources.pdf"]

---

If you are interested in participating in other physician surveys on providing healthcare during this pandemic, here are some links:

Triage of critically unwell patients for ICU care: <https://is.gd/covidtriage>.  
Clinicians' quality of life and moral injury during the COVID-19 pandemic:  
[https://ubc.ca1.qualtrics.com/jfe/form/SV\\_0ND4mEkktlmVAXv](https://ubc.ca1.qualtrics.com/jfe/form/SV_0ND4mEkktlmVAXv).
